# Supplementary material for: Magnetic properties and geochemistry of loess/paleosol sequences at Nowdeh section northeastern of Iran
Source: Copernicus journal article supplement (doi:10.5194/cp-2023-56), 2023-07-25
Supplement: Supplementary file [file cp-2023-56-AC4-supplement.pdf]

1 **Magnetic properties and geochemistry of loess/paleosol sequences at Nowdeh section**  
2 **northeastern of Iran**

3 Vahid, Feizi\*<sup>1</sup>, Ghasem, Azizi<sup>2</sup>, Habib, Alimohammadian <sup>3</sup>, Maryam Mollashahi <sup>4</sup>

4 1- Ph.D. Dep. of Geography, Climatology, Tehran University, [Vahid.feizi62@gmail.com](mailto:Vahid.feizi62@gmail.com)

5 2- Professor., Dep. of Geography, Climatology, Tehran University, [ghazizi@ut.ac.ir](mailto:ghazizi@ut.ac.ir)

6 3- Assistance Prof, Environment Magnetic Laboratory, Dep. of Geology and Mineral Exploration

7 [halimohammadian@gmail.com](mailto:halimohammadian@gmail.com)

8 4- *Assistant Professor of Forestry in Arid regions, Faculty of Desert Study, Semnan University, Iran*

9 [maryam.mollashahi@semnan.ac.ir](mailto:maryam.mollashahi@semnan.ac.ir)

10 \*-Corresponding Author: 00989127985286

11 **Abstract**

12 The loess-palesols sequences in the northeastern of Iran are high-resolution natural  
13 archive of climate and environmental change, providing evidence for the interaction  
14 between accumulation and erosion of aeolian and fluvial sediments during the  
15 Middle and Late Pleistocene. In this study, Azadshar (Nowdeh Loess Section) was  
16 selected to reconstruct Late Quaternary climate change. The Nowdeh loess/ paleosol  
17 sequences with 24 m thickness were sampled for magnetic and geochemical  
18 analysis. The section systematically and with high resolution (10 cm intervals) were  
19 sampled and totally 237 samples were taken. Magnetic susceptibility of all samples  
20 were measured in Environmental and Paleomagnetic laboratory based at Geological  
21 Survey of Iran, Tehran, Iran. The geochemical analysis of selected samples (peak of  
22 magnetic susceptibility) were included to assist the paleoclimatic interpretation of  
23 the magnetic signals. The result of magnetic susceptibility of Loess/paleosol  
24 deposits show low magnetic susceptibility values in cold and dry climate periods  
25 (Loess) and high magnetic susceptibility values in warm and humid climate periods  
26 (paleosol). Comparison of magnetic and geochemical data show that the results of  
27 geochemical weathering ratio variations such as magnetic parameters variations are  
28 with magnetic susceptibility. High degree of coherency between the intensity of  
29 magnetic susceptibility and Rb/Sr, Mn/Ti, Zr/ Ti and Mn/ Sr ratio are confirmed.

30 Keyword: Loess/paleosols sequences, Climate, Magnetic parameters, Geochemical proxies,  
31 Northeastern of Iran.

32  
33  
34 **Introduction**

35 Reconstruction of the Quaternary climate is an important constraint for the  
36 development of climate models that lead to a better understanding of past and present

37 and prediction of future, climate development. Loess–paleosol sequences are now  
38 recognized as one of the most complete terrestrial records of glacial–interglacial  
39 cycles of the Quaternary Period (Porter, 2001; Muhs and Bettis, 2003, Pierce et al.,  
40 2011).

41 Aeolian sediments with paleosol layer enumerate as a best sediment records for  
42 paleoclima especially for Quaternary evidence in continents (Guo et al, 2002).  
43 Loess/paleosols sequence are one of the important natural climate change archives  
44 in continents and have been used for reconstruction of Quaternary climate and  
45 geomorphological changes (Karimi et al., 2011; Frechen et al., 2003; Prins et al.,  
46 2007).

47 Loess deposits have covered large areas of the northeast, east central, north and  
48 central parts of Iran which are part of loess belt that cover the Middle East and  
49 extend further northward into Turkmenistan, Qazakistan and Tajikistan (Okhravi  
50 and Amini, 2001).The extensive and thick loess deposits in northern Iran have been  
51 recently studied in detail setting up a more reliable chronological framework for the  
52 last interglacial/glacial cycle (Lateef, 1988; Pashae, 1996; Kehl et al., 2006;  
53 Frechen et al., 2009, Karimi et al, 2009, Karimi et al, 2013, Okhravi and Amini,  
54 2001, Mehdipour et al, 2012).

55 Paleoclimatical studies of loess deposits based on rock magnetism and  
56 combination of magnetism and geochemistry of loesses around the world have  
57 attained appreciable advances in the past few decades (Heller and Liu, 1984; Forster  
58 et al., 1996; Ding et al., 2002; Guo et al., 2002; Chlachula, 2011; Bronger, 2003;  
59 Baumgart et al., 2013, Guanhua, et al, 2014).

60 These provide a relatively loess-paleosols sequence records that cover the area of  
61 Chinas loess plateaus, Germany, Poland, Tajikestan, Austrian, Ukraine, Danube  
62 catchment (Hosek et al, 2015,Ahmad and Chandra, 2013, Chen, 2010; Jordanova et  
63 al., 2011; Buggle et al., 2009; Fitzsimmons et al., 2012; Fischer et al., 2012; Jary  
64 and Ciszek, 2013; Baumgart et al., 2013; Schatz et al., 2014; Gocke et al., 2014).

65 Geographical latitude of North of Iran is similar to middle Asia and China.

66 These are very limited records of concerning loess deposits of Iran in compare to  
67 other places of world, and therefore this study attempt to explore the potential of  
68 loess deposits in reconstruction of northern Iran during late quaternary.  
69

## 70 **Study area**

71 The Nowdeh section is exposed at about 20 km southeast of Gonbad-e Kavus and  
72 east of Azadshahr city. The Nowdeh river dissects more than 24 m thick sequence

73 of dull yellowish brown (10 YR 5/4) loess covering northeast weathered limestone  
74 dipping.

75 The study area falls between 37° 05' 50" N and 55° 12' 58" E coordinates. This  
76 section is in Alborz structure and its sediment sheet is includes of north of Caspian  
77 Sea. Nabavi (1976) said that "sediment structure of this section is in Gorgan-Rasht  
78 zone and Paratetis district". This zone includes of regions that locate in north of  
79 Alborz fault and south of Caspian Sea. Toward the east, Gorgan-Rasht zone cover  
80 with thick layers of loess.

81 Attention to above statements, deal with to identifying of segment for sampling.  
82 After searching, Nowdeh section that has been used for soil study in before years by  
83 Kehl et al (2005) and Frichen et al (2009) were selected. One of another reason to  
84 selection this section was having 12 dating that have done in before studies  
85 (Figure1).

86

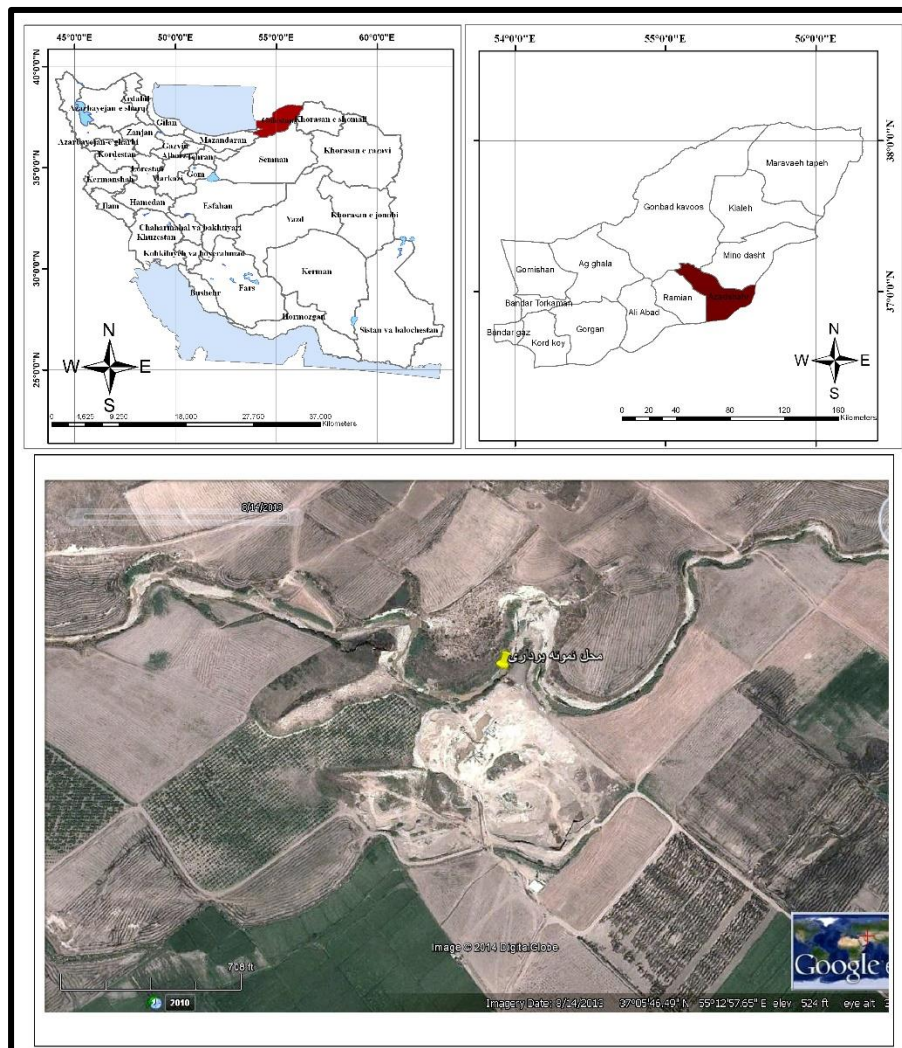

87  
88

Figure 1: Map of Iran and the location of Nowdeh loess-paleosol sequence.

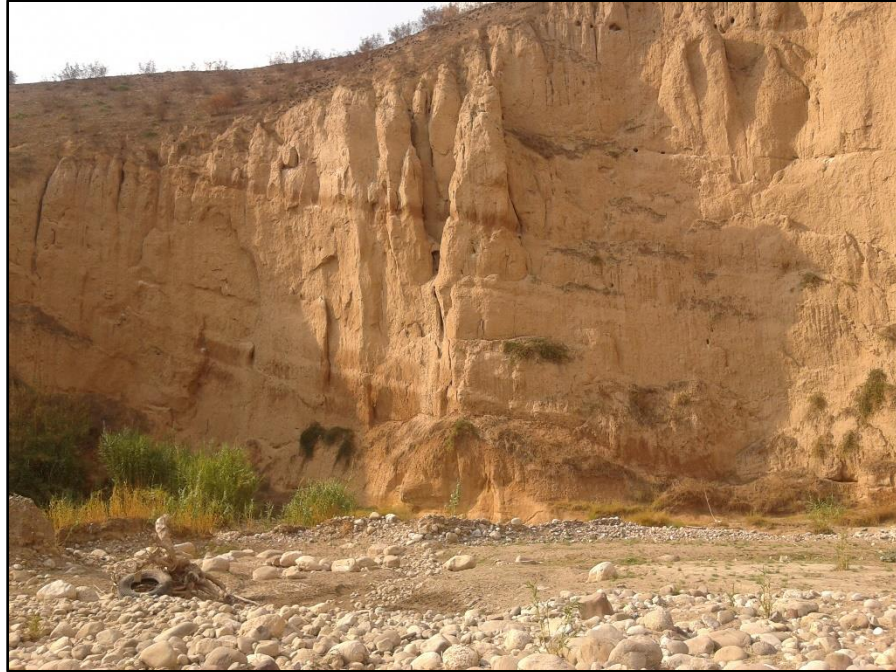

89

90 Figure 2: A view of the sedimentary section of the Nowdeh and the layers formed in it

### 91 Methodology

92 In this study, Azadshar (Nowdeh Loess Section) was selected to reconstruct Late Quaternary  
93 climate change in the north Iran. The Nowdeh loess section with an about 24 m thickness were  
94 sampled in detailed 10 cm intervals with magnetometry and geochemical of the analysis. For this  
95 aim, sampling location and method was determined after consecutive study area. Magnetic  
96 susceptibility of all samples was measured in Environmental and Paleomagnetic laboratory based  
97 at Geological Survey of Iran, Tehran, Iran. The magnetic susceptibility represents the integrated  
98 response of diamagnetic, paramagnetic, ferrimagnetic and imperfect antiferromagnetic minerals.  
99 All samples were placed in an 11 cm<sup>3</sup> plastic cylinders to be used in magnetic measurement  
100 instruments. Magnetic susceptibility was measured using AGICO company made Kappabridge  
101 model MFK1-A instrument.

102 Saturation isothermal remnant magnetization (SIRM) were determined which reflects the  
103 concentration of ferromagnetic and imperfect antiferromagnetic minerals. The HIRM ('hard'  
104 isothermal remanence) magnetization is calculated to determine the magnetically based  
105 component such as hematite in samples following the formula:

$$106 \text{ HIRM} = 0.5(\text{SIRM} + \text{IRM}_{-0.3\text{T}})$$

107 Where  $\text{IRM}_{-0.3\text{T}}$  is the remanence after application of a reversed field of 0.3 T after growth and  
108 measurement of SIRM. The HIRM reflects the contribution specifically of the imperfect  
109 antiferromagnetic minerals hematite and goethite (Bloemendal *et al.*, 2008).

110 The  $S_{-0.3\text{T}}$  value, or  $S_{\text{-ratio}}$ , is calculated as

111  $S_{-0.3T} = 0.5[(-IRM_{-0.3T}/SIRM) + 1]$

112 And is ranged between 0 and 100%. It reflects the ratio of ferrimagnetic to imperfect  
113 antiferromagnetic minerals (Bloemendal *et al.*, 2008).

114 Base on the results of magnetic susceptibility, the geochemical proxies of chemical weathering of  
115 selected 70 samples (trace elements) are included to assist the paleoclimatic interpretation of the  
116 magnetic signals.

117

## 118 **Results**

### 119 **Magnetic properties**

120 Figure 3 show relationship of susceptibility, NRM, SIRM, HIRM and  $S_{-0.3T}$  in  
121 Nowdeh section. The variation of magnetic susceptibility signal in the Nowdeh  
122 section suggests variation in climate conditions and mechanisms during the Late  
123 Quaternary. The rock magnetic records correlate well with the lithology in Nowdeh  
124 section. In general, the paleosols are characterized by an enhancement of the  
125 magnetic signal compared to loess. The values of  $\chi$  (in  $10^{-8} \text{ m}^3 \text{ kg}^{-1}$ ) vary from  
126 28.17 to 203.13 in Nowdeh section. Maximum  $\chi$  values (203.13) occur in the lower  
127 paleosol layer (19.4 m) and minimum values occur in the top loess layer (7.4 m).

128 The variance of this parameter is at the depth of 22-23.7 m and had a salient decrease  
129 at the depth 22.1 m. Then the variation range decrease until 20 meter of depth. Severe  
130 variation of magnetic susceptibility has been observed at the depth of 20 to 16 m.  
131 After that  $\chi$  decrease until 16 to 10 m of depth and then again variation in  $\chi$  has  
132 observed from 10 to 8 meter of depth respectively.

133 Paleosols showing higher values of  $\chi$  than loesses, where the magnetic enhancement  
134 occurs in the Bw, Bt, Btk, whereas the underlying C (loess) horizon is characterized  
135 by lower values of  $\chi$ . This is very likely caused by the precipitation of iron oxides in  
136 Bw horizon and consequently a higher amount of pedogenetic magnetite in  
137 comparison with the C horizon can be observed (Jordanova *et al.*, 2013, Hosek *et al.*,  
138 2015). The  $\chi$ -values of the lower and middle part of Nowdeh section, approximately  
139 53-80 and 120-140 Ka representing intermediate values between unweathered  
140 loesses and weathered paleosols.

141 The results showed that NRM is consonant with magnetic susceptibility variance.  
142 This consonant variation especially is so in lower depth and the highest record of  
143 this parameter occurred in 13.1 meter of earth surface that posed in BW, BWK  
144 horizon. Variations and differences in magnetic susceptibility are very agreed with



145 SIRM of Loess sequence. As magnetic susceptibility decrease, SIRM also decrease  
 146 and overhand. Between the 20 to 50 ka, which most of upper Loess has formed, the  
 147 magnetic susceptibility show no variation likewise SIRM diagram show that in this  
 148 median. High value of HIRM in fig 2 reflects concentration and frequencies of  
 149 magnetic deterrent minerals such as Goethite, maghemite or hematite has increased.

150 Comparison of lower values of S ( $\sim 0.3$  T) (between 0.6 to 0.12 Am/m) and higher value  
 151 of HIRM (between 2 to 5 Am/m) show that the ratio of minerals with lower (such as  
 152 magnetite) is very lower than the ratio of minerals with high in paleosols. This is in  
 153 contrast with loess deposit.

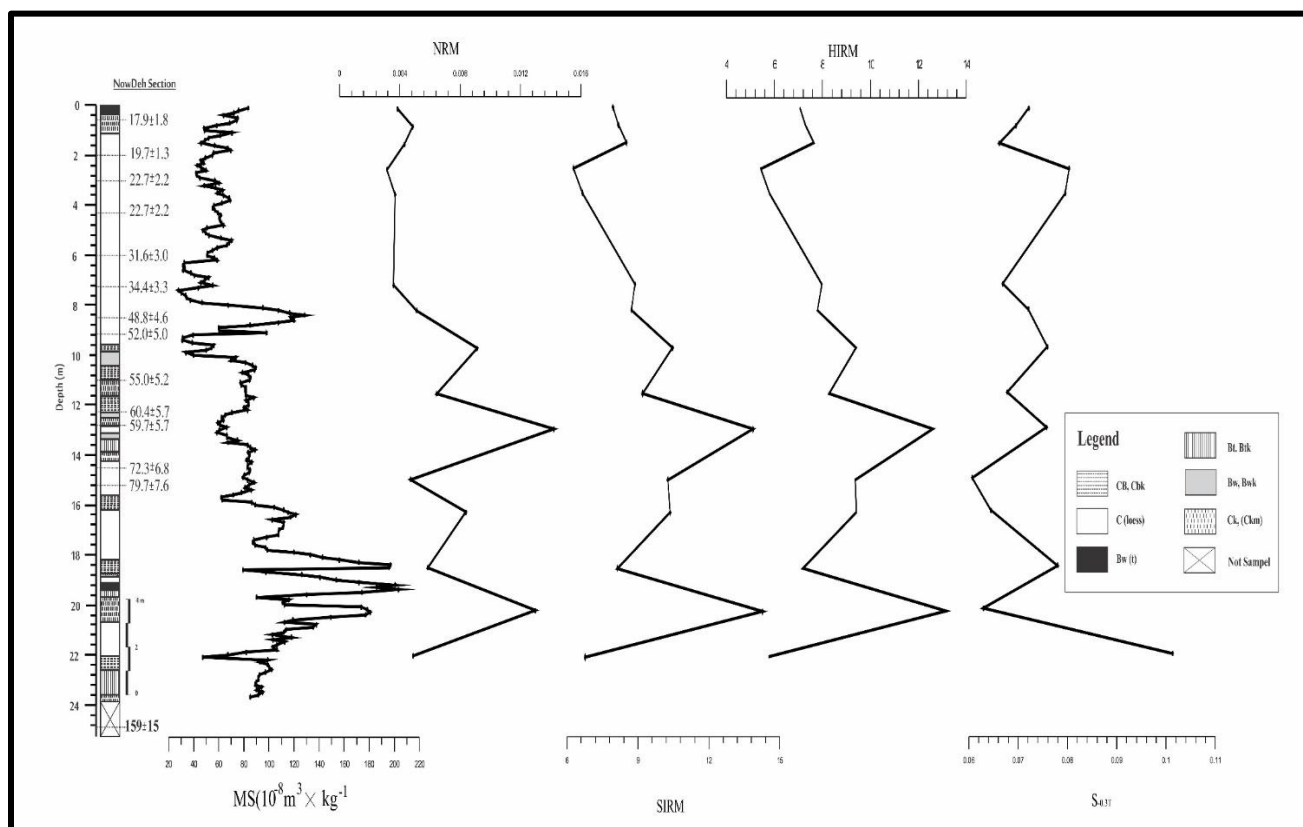

154  
 155 Figure 3: Basic magnetic parameters for Nowdeh section.

156 **Element stratigraphy**

157 Figure 4 shows correlation between concentration of selected element (Sr, Rb, Zr,  
 158 Ti and Mn) and magnetite susceptibility in Nowdeh section.

159 As it is clear from this figure variation in concentration of these elements are high  
 160 with differences in between. Sr and Rb have similar trend along Nowdeh section. At  
 161 the depth of 2.9 m of depth, there is an increase in concentration of these two

162 elements. Which corresponds with an age of 22 ka. The concentration of these two  
163 elements is decreased right after this point.

164 The lower concentration of elements has recorded at the depth of 8.5 meter with 48.8  
165 ka in age. There is no variation in concentration of these elements after this depth  
166 (8.5 meter) in concentration of these elements have occurred at the depth of 18  
167 meters. These elements is the highest record of concentration in Nowdeh section.

168 Ti, Zr and Mn show approximately similar trend in diagram. These elements show  
169 little variation in concentration in outset of the section.

170 But from depth of 6.2 meter and with an age of to 31.1. The variation in concentration  
171 begin to increase and attain the highest value in this zone. Concentration of these  
172 element at the depth of 8.5 m (34.4 ka). Followed by decrease at the depth of 9.3  
173 meter, are the main elements in this part of Nowdeh section. This is a little variation  
174 in concentration of these elements up to the depth of 16.7 meter. From the depth of  
175 16.7 m up to the bottom of the section in concentration of elements show zig-zag  
176 pattern.

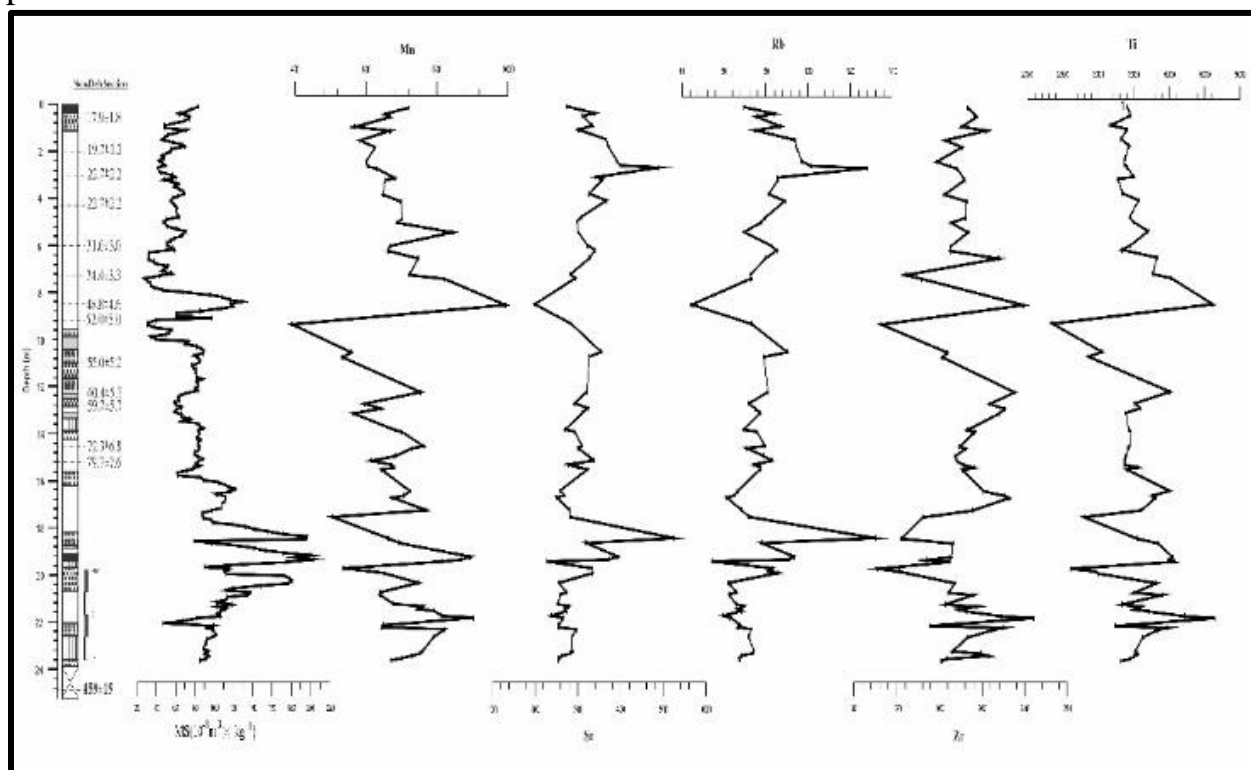

177  
178 Figure 4: shows depth series of selected element concentrations for Nowdeh section.

179

180 **Trace element ratio**

181 The variation of Si/Ti ratio is following magnetic susceptibility except for lower part  
182 of the section (23-24m). The variation of Mn/Sr, Zr/Ti and Mn/Ti almost show no  
183 change except for depth 8.5 m corresponding to 48.8 ka in age. The variation of  
184 Rb/Sr ratio is almost opposite of MS pattern especially at the depth of 8.5, 16, 19  
185 and 22 m. the variation of Ba/Rb ratio is also following MS pattern except at depth  
186 of 13,15, 19 and 22.8 m which are opposite to each other. Figure 5 show depth series  
187 of selected element ratio concentrations for the Nowdeh section with the frequency  
188 dependent magnetic susceptibility.

189 Si/Ti variation in these ratio do not show any consistent relationship to the sequence  
190 of loess/palaeosol layers (as defined by the magnetic susceptibility) at Nowdeh  
191 section. Mn/Ti — this ratio tend to be show elevated values in the palaeosols,  
192 probably as the result of the concentration of Mn oxide in the finer sediment  
193 fraction(Bloemendal , et al, 2008).

194  
195 Zr/Ti, Mn/Ti, Rb/Sr and Mn/Sr—the curves of these ratios show a very clear pattern  
196 of elevation in the palaeosols, and their high degree of similarity is noteworthy.  
197 Rb/Sr has been proposed by several workers as an indicator of pedogenic intensity  
198 for loess based on the differential weather ability of the major host minerals — K-  
199 feldspar for Rb and carbonates for Sr. In the case of Mn/Sr, the higher value in the  
200 palaeosol will result from the effect of grain-size on the Mn concentration, as noted  
201 above, and the solution loss of Sr.

202 Chen et al. (1999) compared Rb/ Sr and magnetic susceptibility in the uppermost  
203 (last glacial/interglacial) parts of the Luochuan and Huanxian sections, and found a  
204 striking correspondence between the amplitudes of variation in magnetic  
205 susceptibility and in Rb/Sr.

206 In deep of 19/4m, which is often referenced as a strongly developed palaeosol and  
207 which is taken to represent an interval of warm and humid climate and magnitude  
208 susceptibility is higher, shows only moderate Rb/Sr ratios.  
209



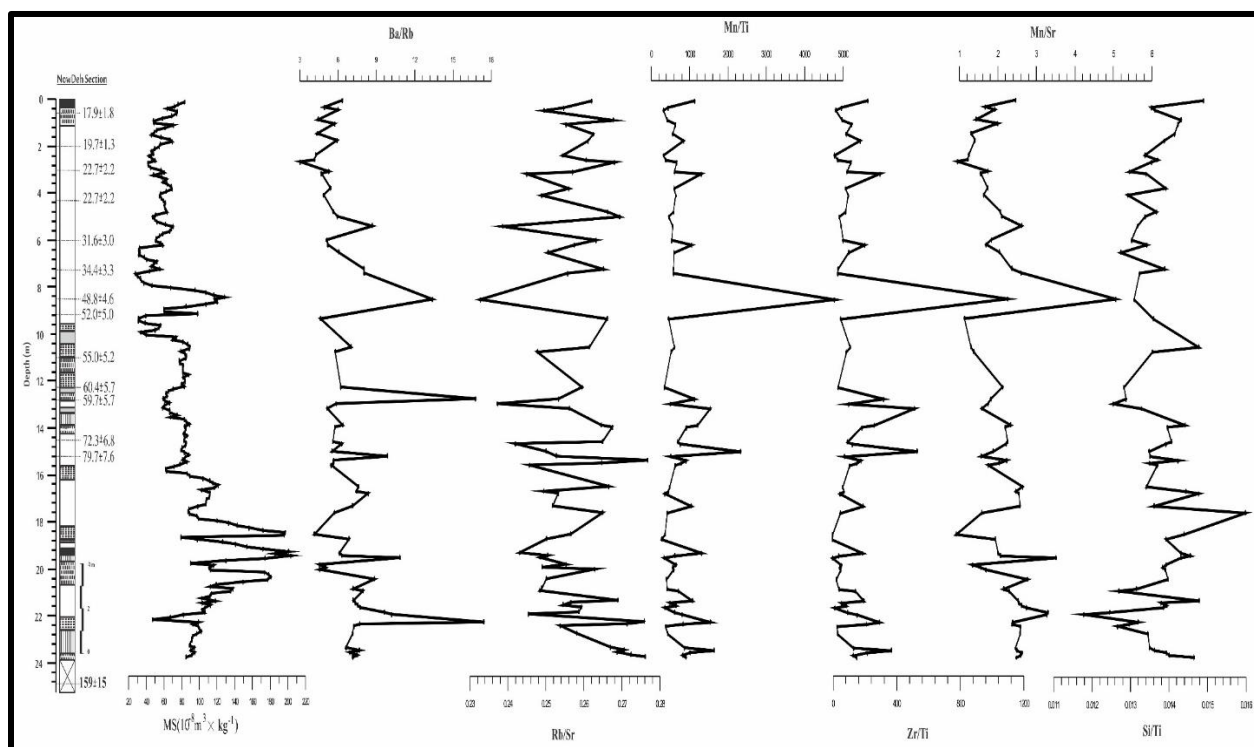

Figure 5: show selected element ratios in Nowdeh section

## Discussion

Considering the entire 159 Ka sequence at the Nowdeh site there is reasonable first order co-variation of the magnetic and geochemical indicators of weathering and soil formation – especially in the case of magnetic parameters reflecting variations in ferrimagnetic content and the Sr based ratios. However, detailed comparison on the basis of individual loess and palaeosol layers shows that there is an inconsistent relationship between the amplitudes of individual peaks and troughs of magnetic and geochemical parameters.

Therefore, suggestions by some workers of a consistent loess magnetic mineralogical and geochemical response to weathering and soil formation clearly possible on the post 159 Ka period.

For identification of relationship between climate change and magnetic properties of sediments, magnetic susceptibility of loess sediments in Nowdeh section experimented. Nowdeh magnetic susceptibility results showed cold and dry and warm and humid sequence that related to Loess-paleosol sequence respectively.

Sediment loess formed in cold and dry climate conditions that have low magnetic susceptibility. Whereas in paleosols regarding to pedogenes process, amount of

231 oxidation increase and so magnetic susceptibility records increase. Accordance to  
232 global standard, always in loess/paleosol sequence, paleosols has higher magnetic  
233 susceptibility than adjacent loess. (Song et al, 2008).

234 Because pedogenes possess accuse to strong magnetic minerals formation of Iron  
235 Oxide in soils includes of;  $\text{Fe}_3\text{O}_4$ ,  $\gamma\text{-Fe}_2\text{O}_3$ ,  $\text{Fe}_2\text{O}_3 - \alpha$ . Whereas mineral magnetic  
236 of Loess layer related to grain variation of aeolian resource.

237 Regarding to fig 3, brown layers sequence of dark and light palesosols in Loess  
238 demonstrate different process of weather that it is so similar to glacial and  
239 interglacial periods in middle and last of Pliocene. Paleosole of Nowdeh section  
240 has higher magnetic susceptibility than loess. This content has seen more in low and  
241 old depth that mean of high weather variation on that season. In 21 meter in depth  
242 magnetic susceptibility has a considerable decreasing that indicate a cold and dry  
243 season in this time. Also regarding to magnetic susceptibility chart, in Nowdeh  
244 section magnetic susceptibility increasing has been seen in about of 8 periods. This  
245 indicate temperature and humidity increasing in these times. In each section of  
246 standard global Loess, always, regarding to pedogenes and oxidation, paleosoles  
247 have higher in magnetic susceptibility than adjacent Loess layers (Maher, 2011).

248 Loess units formed in cold and dry weathering periods and mineral magnetic  
249 resource belong to Aeolian sediments. Whereas, because of magnetic susceptibility  
250 content increasing in paleosols, plus mineral magnetic with Aeolian resource,  
251 mineral magnetic (iron oxide of soil) of sediments weathering should form by  
252 improvement of paleosole formation. Studies and researches achievement on  
253 magnetic susceptibility confirm this purports (Maher, 2011, Spassov, 2002).

254 Fig 4 show that magnetic sustainability in cold glacial periods (time of loess layering)  
255 is different with magnetic sustainability in warm interglacial periods (time of  
256 paleosole formation). Results of NRM indicate it's decreasing by loess formation  
257 and it's increasing by paleosols formation. This illustrate relationship between  
258 natural remnant and magnetic susceptibility. So, NRM decreasing express dry and  
259 cold weather condition that is concomitant with loess layers sedimentation. NRM  
260 increasing either represent warm and humid weather conditions.

261 There are two probable reasons for Justification of magnetic susceptibility and  
262 isothermal remnant magnetization low alternation in 20 to 50 years ka that includes  
263 of

- 264 1. Pedogenes process reduce because of cold and dry period
- 265 2. Reducing magnetic entering to loess layers

266 One of another magnetic susceptibility and isothermal remnant magnetization  
267 coincidence is related to 20 last ka. Regarding to magnetic susceptibility variation  
268 in surface layer of soil can say that probably this period of time accordance to  
269 completion of cold weather and todays weather creation in north of Iran (warm and  
270 humid) and SIRM content has increased. Because of SIRM samples just selected at  
271 peak point of magnetic susceptibility so, they don't show details of variations.

272 The comparison of results of this research with the results of Antoine et al., (2013)  
273 on Loess/paleosol sediments of Central Europe, show a close relationship especially  
274 at an age of 32 Ka, which show a climate change has taken place at this age. In both  
275 sections, this change is recorded by decreasing in magnetic susceptibility  
276 approximately in 30 Ka, at the base of deposition of loess, indicating dry and cold  
277 climate in this period and increase in magnetic susceptibility in 32 Ka, which means  
278 appearance of warm and moist climate.

279 Geochemical chart can use as weather indexes. Because they can display various  
280 weathering with different severity. In loess studies, there are several chemical ratio  
281 that can use for reconstruction of paleoclima variations (Ding et al., 2001).

282 Mn, Zr and Ti—variations in the bulk concentrations of soil elements show a straight  
283 forward pattern of stratigraphic variability with higher values in the palaeosols and  
284 lower values in the loess layers (Bloemendal et al., 2008). This reflects in part  
285 carbonate dilution/concentration effects, since a significant amount of the variability  
286 disappears when the elements are expressed on a carbonate-corrected basis.

287  
288 In Nowdeh section, amount of Rb in paleosols was lower than its amount on loess  
289 layers. This occur by high soluble capability of Rb in warm and humid climate  
290 conditions as interglacial period. Gallet et al. (1996) found that Rb was significantly  
291 depleted in the palaeosols.

292 Our results show that Mn/Ti, Zr/Ti and Mn/Sr ratios tend to be show higher values  
293 in the palaeosols. Ding et al., 2001 said that Mn/Ti has had elevated values in the  
294 palaeosols, probably as the result of the concentration of Fe and Mn oxides in the  
295 finer sediment fractions. Also, they said that Rb/Sr and Mn/Sr ratios curves show a  
296 very clear pattern of elevation in the palaeosols same as results of this study. Rb/Sr  
297 has been proposed by several workers as an indicator of pedogenic intensity for loess  
298 based on the differential weatherability of the major host minerals — K-feldspar for  
299 Rb and carbonates for Sr. Mn/Sr, the higher values in the palaeosols will result from  
300 the effect of grain-size on the Mn concentrations, as noted above, and the solutional  
301 loss of Sr.

302 Chen et al. (1999) compared Rb/Sr and magnetic susceptibility in the uppermost  
303 (last glacial/interglacial) parts of the Luochuan and Huanxian sections, and found a  
304 striking correspondence between the amplitudes of variation in magnetic  
305 susceptibility and in Rb/Sr (Bloemendal et al., 2008).

306 In the continuation of the discussion, the results obtained from the magnetic  
307 parameters section of the Nowdeh sedimentary section were compared with other  
308 studies conducted in different parts of the world.

309 The magnetic receptivity results of the Nowdeh sedimentary section were compared  
310 with the pollenological results of sedimentary cores taken from Urmia Lake (Djamali  
311 et al, 2008) and with the results of oxygen 18 isotope analysis on Arabian Sea  
312 sedimentary cores (Tzedakis, 1994). In this comparison, it was observed that in the  
313 mentioned lakes, an increase in the AP/NAP index corresponded to the appearance  
314 of ancient soil layers in the seedling sedimentary section. An increase in the AP/NAP  
315 index indicates rising temperature and humidity, leading to the proliferation of trees  
316 and shrubs in the environment. Conversely, a decrease in this index signifies a drop  
317 in temperature and humidity, resulting in the destruction of trees and shrubs and the  
318 alteration of the surface cover. Therefore, it can be inferred that the weather  
319 conditions and their fluctuations in the western parts of Iran coincided with the  
320 sedimentary deposition at Nowdeh.

321 Furthermore, the oxygen isotope 18 of the Arabian Sea exhibited a strong agreement  
322 with the magnetic receptivity. A decrease in this index indicates warm weather  
323 conditions, while an increase suggests cold weather conditions. As depicted in Figure  
324 6, the rise in magnetic susceptibility aligns with the decline in oxygen isotope 18 in  
325 the sediments of the Arabian Sea. Figure 6 illustrates the correlation between the  
326 recorded pollenology data of Lake Urmia and the oxygen isotope 18 of the Arabian

327 Sea sediments with the sequence of ancient loess-soil sediments of the Nowdeh  
 328 sedimentary section.

329

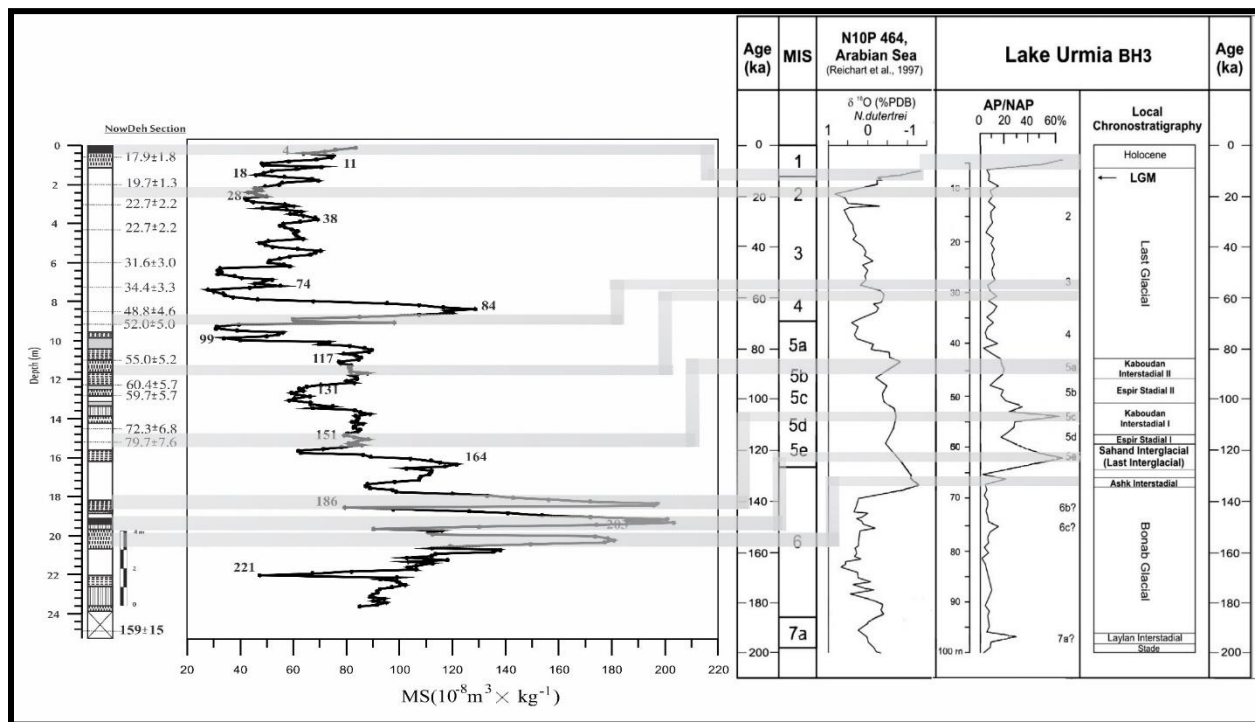

330  
 331 Figure 6: Correlation between recorded pollenological data of Lake Urmia (Djamali et al, 2008) and oxygen  
 332 isotope 18 of Arabian Sea sediments (Tzedakis, 1994) with the Loess-Paleosol sediment sequence of  
 333 Nowdeh sedimentary section.

334 The results of the current research exhibit a strong correlation with the studies  
 335 conducted by Fuchs et al. in 2013 and Hosek et al. in 2015 on the ancient loess-soil  
 336 deposits of Central Europe. As illustrated in Figure 7, over the past 45, 73, 90, 104,  
 337 and 108 thousand years, the recorded fluctuations in the magnetic receptivity  
 338 parameter showed consistent patterns across the study sections. Around 45 and 73  
 339 thousand years ago, a notable increasing trend in magnetic receptivity can be  
 340 observed in all the analyzed layers, as depicted in the figure. The findings suggest a  
 341 shift in weather conditions during this period towards a warmer and more humid  
 342 climate compared to preceding periods. Consequently, the increased presence of iron  
 343 oxides in the soil due to chemical weathering led to a rise in magnetic susceptibility.  
 344 Furthermore, in the periods of 90, 104, and 108 thousand years ago, a decrease in  
 345 magnetic receptivity was noted across all regions, indicating colder and drier  
 346 climatic conditions during these intervals. While older sediments also demonstrate a  
 347 significant relationship with climate variations in Central Europe and the Nowdeh

348 area, the absence of radiometric dating in these older sediments introduces some  
 349 uncertainty when interpreting these findings.

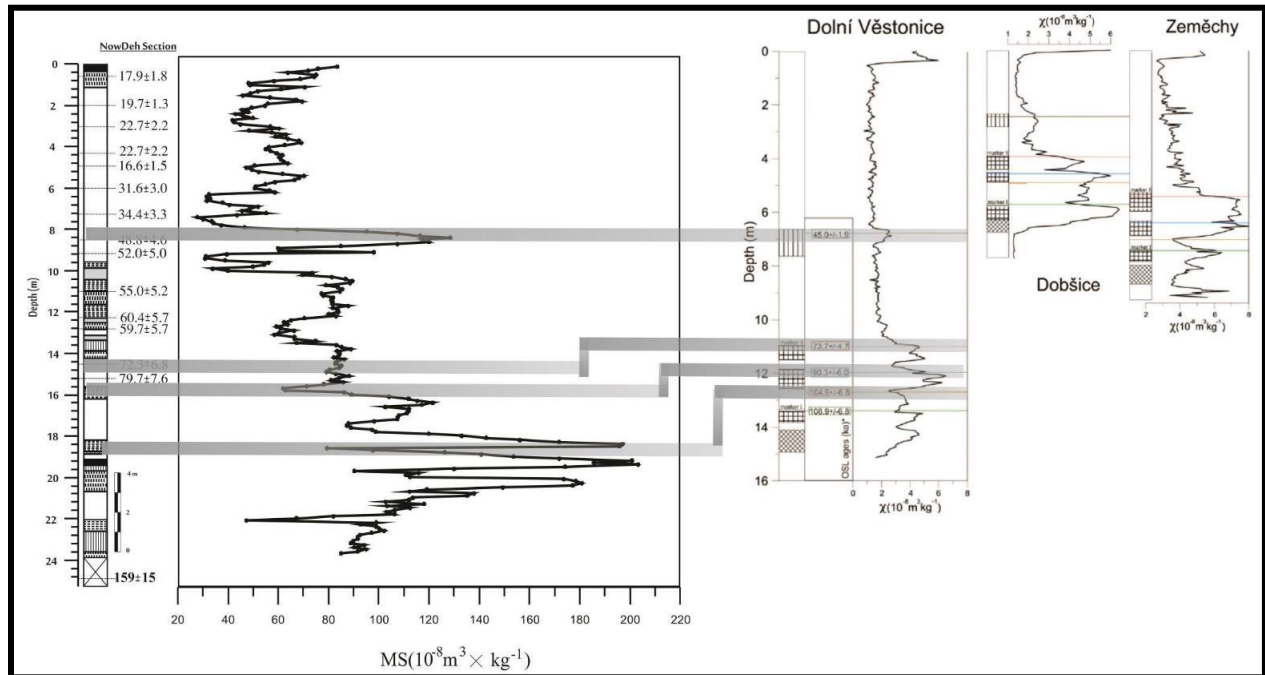

350  
 351 Figure 7: Comparison of changes in magnetic receptivity of Dolní Věstonice sedimentary section, Fuchs  
 352 et al, 2013, Dobsice and Zemechy section, Hošek et al, 2015, with Nowdehh sedimentary section

353 Based on Figure 8, it can be seen that the trend of magnetic receptivity recorded in  
 354 sedimentary sections of Beiuyan, Heimugou, Biampo, An et al, 1991, oxygen isotope  
 355 records 18Imbrie et al, 1984 has a high agreement with Nowdeh sedimentary section.  
 356 This issue shows the same weather conditions in different compared places in the  
 357 Northern Hemisphere.

358





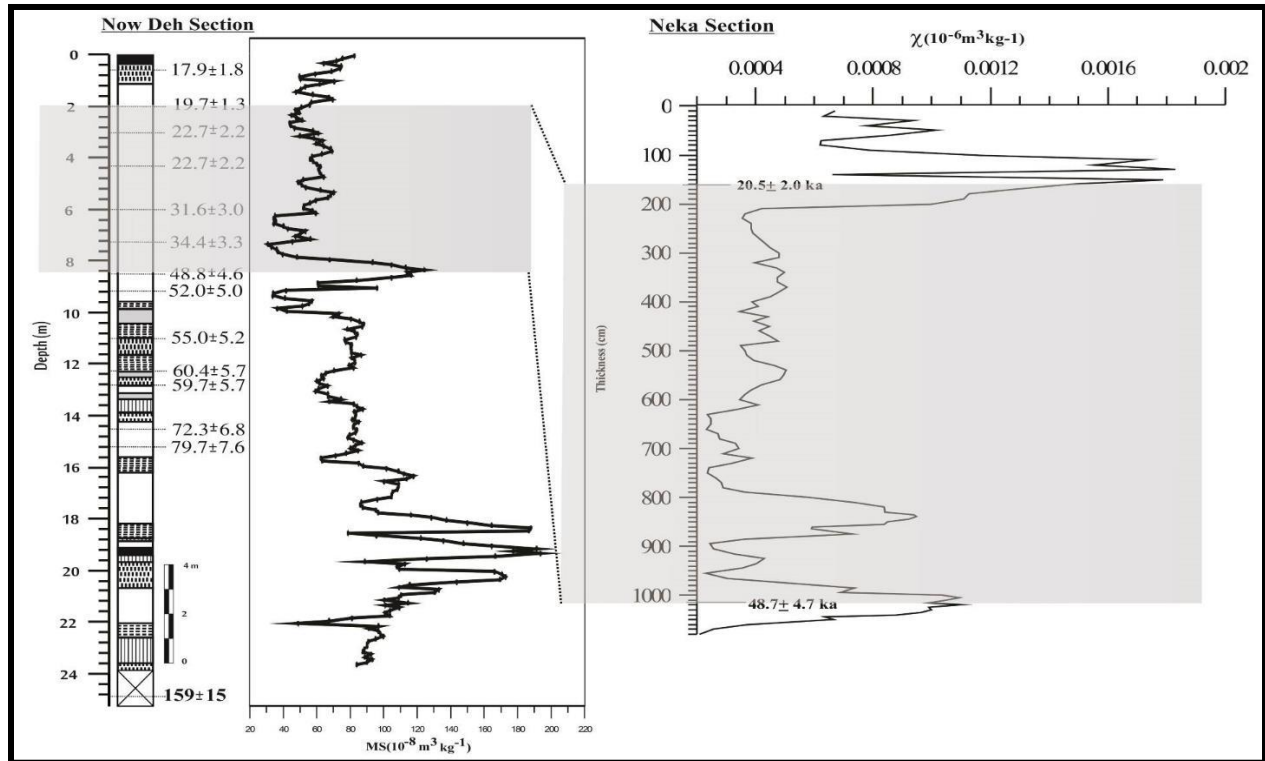

372

373 Figure 9: Comparison of magnetic receptivity diagram of Nowdeh sedimentary section with Neka  
 374 sedimentary section (Mahdi et al., 2012)

375 Also, the results of this research are very consistent with Beer and Sturm's research in 1995 regarding the  
 376 beryllium saturation of Zaifang sedimentary section and the results of oxygen isotope 18 of marine  
 377 sediments. In both cases, simultaneously with the reduction of beryllium and oxygen isotope 18, the  
 378 amount of magnetic receptivity also decreases, and with the increase of these parameters, the amount  
 379 of magnetic receptivity increases. In both mentioned cases, hot and humid and cold and dry weather  
 380 periods have a high agreement with the results obtained from the sedimentary section of Nowdeh, and it  
 381 shows the simultaneity of similar weather events in the past (Figure 10).

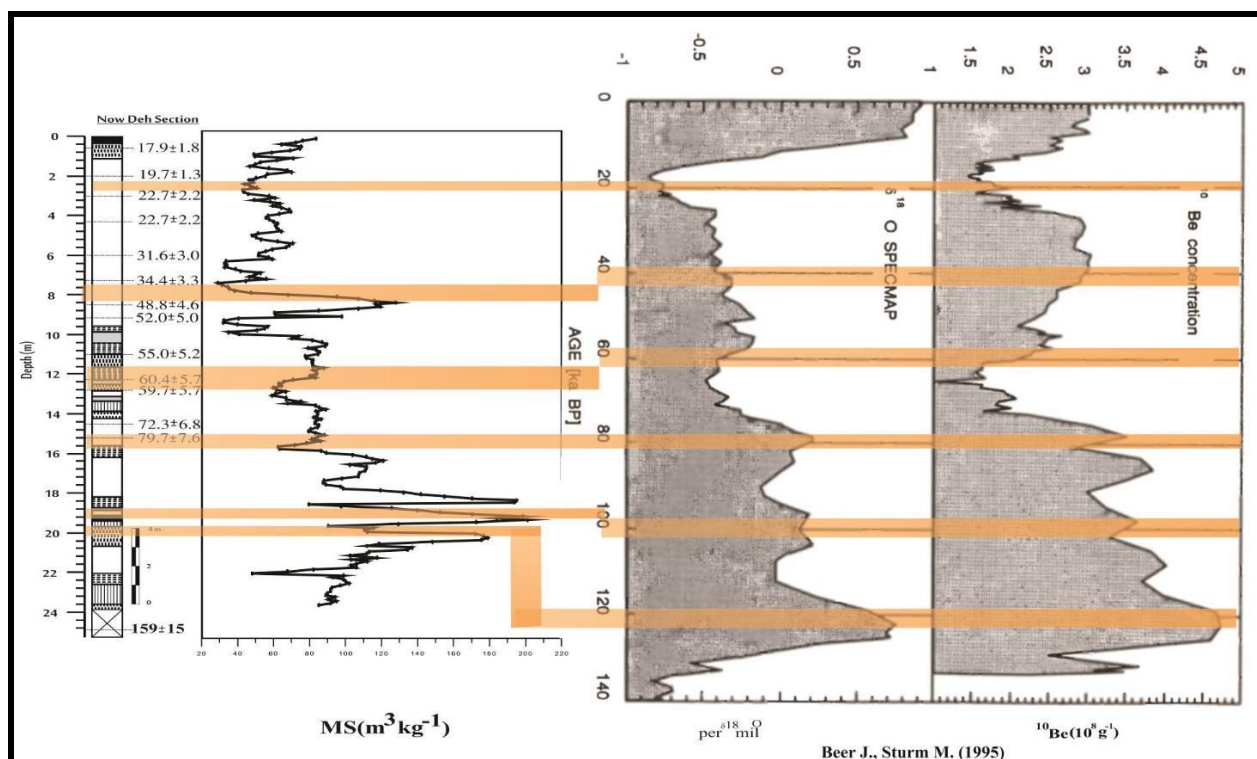

382  
 383 Figure 10: Comparison of magnetic receptivity results of Nowdeh sedimentary section in comparison with  
 384 oxygen 18 and barium 10 isotope results of Xifeng sedimentary section (Beer and Sturm, 1995).

385  
 386 **Conclusion**

387 Loess/paleosols sequences from Northeastern of Iran provide a suitable archive for  
 388 a detailed study of the Upper Pleistocene paleoenvironmental changes. Using a  
 389 multi-proxy approach combining sedimentological, magnetic and geochemical  
 390 methods—we demonstrate that:

- 391 • The stratigraphy of the studied section conform well to the general pattern of  
 392 the Upper Pleistocene loess/paleosol successions in the relatively loess of  
 393 Northeastern of Iran.
- 394 • Because of high relationship between magnetic minerals and climate  
 395 conditions, magnetic parameters are an efficient variables for reconstruction  
 396 of climate change.
- 397 • Comparison of magnetic and geochemical charts show that the results of  
 398 geochemical weathering ratio variations are same as magnetic weathering  
 399 parameters variations such as magnetic susceptibility.
- 400 • High degree of coherency between the amplitudes of magnetic susceptibility  
 401 and Rb/Sr, Mn/Ti, Zr/ Ti and Mn/ Sr ratio are confirmed.

403 **References**

- 404 1. Ahmad, I., Chandra, R., 2013, Geochemistry of loess-paleosol sediments of Kashmir  
 405 Valley, India: Provenance and weathering, *Journal of Asian Earth Sciences* 66, 73-89.
- 406 2. Antoine, P., Rousseau, D.D., Degeai, J.P., Moine, O., Lagroix, O., Kreutzer, S., Fuchs, M., Hatte,  
 407 CH., Gauthier, C., Svoboda, J, and Lisa , l., 2013, High-resolution record of the environmental  
 408 response to climatic variations during the Last Interglacial Glacial cycle in Central Europe: the  
 409 loess-palaeosol sequence of Dolní Věstonice (Czech Republic), *Quaternary Science Reviews*, 67,  
 410 PP 17-38.
- 411 3. Baumgart, P., Hambach, U., Meszner, S., Faust, D., 2013. An environmental magnetic  
 412 fingerprint of periglacial loess: records of Late Pleistocene loess paleosol sequences from  
 413 Eastern Germany. *Quat. Int.* 296, 82–93.
- 414 4. Bloemendal, J., Xiuming L., Youbin, S., Ningning L., 2008. An assessment of magnetic  
 415 and geochemical indicators of weathering and pedogenesis at two contrasting sites on the  
 416 Chinese Loess plateau, *Palaeogeography, Palaeoclimatology, Palaeoecology* 257 ; 152–  
 417 168.
- 418 5. Bronger, A., 2003. Correlation of loess-paleosol sequence in East and Central Asia with  
 419 SE Central Europe: toward a continental Quaternary pedostratigraphy and paleoclimate  
 420 history. *Quaternary International* 106/107, 11–31.
- 421 6. Buggle, B., Hambach, U., Glaser, B., Gerasimenko, N., Markovic, S., Glaser, I., Zöller, L.,  
 422 2009. Stratigraphy, and spatial and temporal paleoclimatic trends in Southeastern/Eastern  
 423 European loess–paleosol sequences. *Quat. Int.* 196, 186–206.
- 424 7. Chen, J., An, Z.S., Head, J., 1999. Variation of Rb/Sr ratios in the loess–paleosol sequences  
 425 of central China during the last 130,000 years and their implications for monsoon  
 426 paleoclimatology. *Quaternary Research* 51, 215–219.
- 427 8. Chen, T., Xie, Q., Xu, H., Chen, J., Ji, J., Lu, J., Lu, H and Balsam, W, 2010, Characteristics  
 428 and formation mechanism of pedogenic hematite in Quaternary Chinese loess and  
 429 paleosols, *Catena* 81, 217-225.
- 430 9. Chlachula, J., Little, E., 2011, A high-resolution Late Quaternary climatostratigraphic  
 431 record from Iskitim, Priobie Loess Plateau, SW Siberia, *Quaternary International* 240 ,  
 432 139e149
- 433 10. Ding, Z.L., Ranov, V., Yang, S.L., Finaev, A., Han, J.M., Wang, G.A., 2002. The loess  
 434 record in southern Tajikistan and correlation with Chinese loess. *Earth and Planetary  
 435 Science Letters* 200, 387e400.
- 436 11. Ding, Z.L., Yang, S.L., Sun, J.M., Liu, T.S., 2001. Iron geochemistry of loess and Red  
 437 Clay deposits in the Chinese Loess Plateau and implications for long-term Asian monsoon  
 438 evolution in the last 7.0 Ma. *Earth and Planetary Science Letters* 185, 99–109.
- 439 12. Fischer, P., Hilgers, A., Protze, J., Kels, H., Lehmkuhl, F., Gerlach, R., 2012. Formation  
 440 and geochronology of Last Interglacial to Lower Weichselian loess/palaeosol sequences  
 441 — case studies from the Lower Rhine Embayment, Germany. *E & G Quat.Sci. J.* 61, 48–  
 442 63.
- 443 13. Fitzsimmons, K.E., Marković, S.B., Hambach, U., 2012. Pleistocene environmental  
 444 dynamics recorded in the loess of the middle and lower Danube Basin. *Quat. Sci. Rev.*  
 445 41,104–118.
- 446 14. Forster, T., Evans, M.E., Havlíček, P., Heller, F., 1996. Loess in the Czech  
 447 Republic:magnetic properties and paleoclimate. *Stud. Geophys. Geod.* 40, 243–261.

- 448 15. Frechen, M., Kehl, M., Rolf, C., Sarvati, R., Skowronek A., 2009, Loess Chronology of  
449 the Caspian Lowland in Northern Iran, *Quaternary International*, No. 198, pp. 220-233.
- 450 16. Frechen, M., Oches, E.A., Kohfeld, K.E., 2003. Loess in Europe—mass accumulation rates  
451 during the Last Glacial Period. *Quaternary Science Reviews* 22, 1835–1875.
- 452 17. Gallet, S., Jahn, B.M., Torii, M., 1996. Geochemical characterization of the Luochuan  
453 loess-paleosol sequence, China, and paleoclimatic implications. *Chemical Geology* 133,  
454 67–88.
- 455 18. Gocke, M., Hambach, U., Eckmeier, E., Schwark, L., Zöller, L., Fuchs, M., Löscher, M.,  
456 Wiesenberg, G.L.B., 2014. Introducing an improved multi-proxy approach for  
457 paleoenvironmental reconstruction of loess–paleosol archives applied on the Late  
458 Pleistocene Nussloch sequence (SW Germany). *Palaeogeogr. Palaeoclimatol. Palaeoecol.*  
459 410, 300–315.
- 460 19. Guanhua. L, Dunsheng. X, Ming. J, Jia. J, Jiabo. L, Shuang Z, Yanglei. W, 2014, Magnetic  
461 characteristics of loesspaleosol sequences in Tacheng, northwestern China, and their  
462 paleoenvironmental implications, *Quaternary International*, 3, 1-10.
- 463 20. Guo, Z.T., Ruddiman, W.F., Hao, Q.Z., Wu, H.B., Qiao, Y.S., Zhu, R.X., Peng, S.Z., Wei,  
464 J.J., Yuan, B.Y., and Liu, T.S., 2002. Onset of Asian desertification by 22 Myr ago inferred  
465 from loess deposit in China. *Nature* Vol. 416, pp. 159–163.
- 466 21. Heller, F., Liu, T., 1984. Magnetism of Chinese loess deposits. *Geophys. J. R. Astron. Soc.*  
467 77, 125–141.
- 468 22. Hošek, J. Hambach, U. Lisá, L. Matys G. T. Horáček, I., 2015, an integrated rock-magnetic  
469 and geochemical approach to loess/paleosol sequences from Bohemia and Moravia (Czech  
470 Republic): Implications for the Upper Pleistocene paleoenvironment in central Europe,  
471 *Palaeogeography, Palaeoclimatology, Palaeoecology* 418, 344–358.
- 472 23. Jary, Z., Ciszek, D., 2013. Late Pleistocene loess–paleosol sequences in Poland and  
473 western Ukraine. *Quat. Int.* 296, 37–50.
- 474 24. Jordanova, D., Grygar, T., Jordanova, N., Petrov, P., 2011. Palaeoclimatic significance of  
475 hematite/goethite ratio in Bulgarian loess–paleosol sediments deduced by DRS and rock  
476 magnetic measurements. In: Petrovsky, E., Ivers, D., Harinarayana, T., Herrero- Bervera,  
477 E. (Eds.), *the Earth's Magnetic Interior. IAGA Special Sopron Book Series. Springer-*  
478 *Verlag, Berlin.*
- 479 25. Karimi, A., Khademi, H., Ayoubi, A., 2013, Magnetic susceptibility and morphological  
480 characteristics of a loess–paleosol sequence in northeastern Iran, *Catena*, 101, pp. 56-60.
- 481 26. Karimi, A., Khademi, H., Jalalian, A., 2011, Loess: Characterize and application for  
482 paleoclimate study, *Geography Research*, Volume 76, pp1-20.
- 483 27. Karimi, A., Khademi, H., Kehl, M., Jalalian, A., 2009, Distribution, Lithology and  
484 Provenance of Peridesert Loess Deposits in Northeast Iran, *Geoderm*, No.148, pp. 241-  
485 250.
- 486 28. Kehl, M., Frechen, M., Skowronek, A., 2005, Paleosols Derived from Loess and Loess-  
487 like Sediments in the Basin of Persepolis, Southern Iran, *Quaternary International*,  
488 No.140/141, pp.135-149.
- 489 29. Kehl, M., Sarvati, R., Ahmadi, H., Frechen, M., Skowronek, A., 2006, Loess /  
490 Paleosol sequences along a Climatic Gradient in Northern Iran, *Eiszeitalter und Gegenwart*,  
491 No. 55, pp.149-173.
- 492 30. Lateef, A.S.A., 1988. Distribution, provenance, age and paleoclimatic record of the loess  
493 in Central North Iran. In: Eden, D.N., Furrkert, R.J. (Eds.), *Loess – its Distribution, Geology*

- 494 and Soil. Proceeding of an International Symposium on Loess, New Zealand, 14–21  
495 February 1987. Balkema, Rotterdam, pp. 93–101.
- 496 31. Mehdipour, F, 2012, Investigation of paleoclimate in late quaternary western alborz using  
497 of technical applied and magnetism parameters, *Geology and Mineral Exploration*, master  
498 science thesis.
- 499 32. Nabavi, Mehdi, 1976, *Introduction geology of Iran*, pp1-109.
- 500 33. Okhravi, R. Amini, A., 2001, Characteristics and Provenance of the Loess Deposits of the  
501 Gharatikan Watershed in Northeast Iran, *Global and Planetary Change*, No. 28, pp.11-22.
- 502 34. Pashaei, A., 1996, Study of Chemical and Physical and Origin of Loess Deposits in Gorgan  
503 and Dasht Area, *Earth Science*, 23/24, pp. 67-78.
- 504 35. Prins, M.A., Vriend, M., Nugteren, G., Vandenberghe, J., Huazu, L., Zheng, H., Weltje,  
505 G.J., 2007. Late Quaternary aeolian dust input variability on the Chinese Loess Plateau:  
506 inference from unmixing of loess grain-size record. *Quaternary Science Reviews* 26, 230–  
507 242.
- 508 36. Schatz, A.-K., Scholten, T., Kühn, P., 2014. Paleoclimate and weathering of the Tokaj (NE  
509 Hungary) loess–paleosol sequence: a comparison of geochemical weathering indices and  
510 paleoclimate parameters. *Clim. Past Discuss.* 10, 469–507.
- 511 37. Song, Y., Shi, Z., Dong, H., Nie, J., Qian, L., Chang, H. & Qiang, X., 2008- Loess Magnetic  
512 Susceptibility in Central Asia and its Paleoclimatic Significance. *IEEE International  
513 Geoscience & Remote Sensing Symposium*, II 1227-1230, Massachusetts.
- 514 38. Spassov, S., 2002. *Loess Magnetism, Environment and Climate Change on the Chinese  
515 Loess Plateau*. Doctoral Thesis, ETH Zürich, pp. 1–151.
- 516 39. Taylor, S.R., McLennan, S.M., McCulloch, M.T., 1983. Geochemistry of loess, continental  
517 crustal composition and crustal model ages. *Geochimica et Cosmochimica Acta* 47, 1897–  
518 1905.
